# Supplementary material for: One-step fabrication of colloidosomes through in situ self-assembly of micron-sized primary particles
Source: Royal Society of Chemistry journal article supplement (doi:10.1039/c2jm32555a), 2012-01-01
Supplement: c2jm32555a.pdf [file c2jm32555a.pdf]

## Supporting Information

### Part 1. Description on materials used in the present work

**Table S1** Details of the materials used in the experiments

| Chemicals                            | Abbreviation in the text | Grade of materials | Manufacturer                                         |
|--------------------------------------|--------------------------|--------------------|------------------------------------------------------|
| Trihydroxymethyl propane triacrylate | TMPTA                    | Not specified      | Tianjiao chemicals, Tianjin, China                   |
| Styrene                              | St                       | Chemical pure      | Beijing chemicals, Beijing, China                    |
| Anhydrous ethanol                    | EtOH                     | Chemical pure      | Qiuzhu Corp. of science & technology, Tianjin, China |
| Azobisisobutyronitrile               | AIBN                     | Chemical pure      | Damao chemicals, Tianjin, China                      |
| Ethyl benzene                        | EB                       | Chemical pure      | Fuyu chemical Corp., Tianjin, China                  |
| Cyclohexane, xylene and toluene      |                          | Chemical pure      | All from Fuyu Chemical Corp., Tianjin, China         |
| Water                                | H <sub>2</sub> O         | Double distilled   | Done in the laboratory                               |

### Part 2. Description on precipitation polymerization and sample characterization

**Polymerizations** were carried out in glass bottles of 120 mL capacity. In each was charged 2 mL of monomers TMPTA and St at varied mass ratios, along with 2.0 wt% azobisisobutyronitrile (AIBN) relative to the monomers. 98 mL of ternary solvent mixture consisting of distilled H<sub>2</sub>O, anhydrous EtOH and ethyl benzene (EB) at different volume ratios was then added into each bottle. After complete dissolution of the monomers and the initiator followed by nitrogen purge for 5 min, all bottles were sealed off and located into a thermostat, whose temperature was increased to 70 °C within 1 h. The initially homogeneous reaction mixtures turned milky white within 5 to 10 min after reaching 70 °C, depending on the formulation. Unless otherwise stated, all reactions were run for 4 h. In some parallel runs, EB was replaced by a same volume of an alternative solvent, including cyclohexane, xylene, toluene, ethyl benzene, acetone, acetonitrile, ethyl acetate, butanone, octanol and trichlormethane, 10 solvent in total.

**Sample characterization:** Upon polymerization, sample was taken out from the reaction bottle and a few drops of the sample placed on a glass plate. After evaporation of the solvents at room temperature, the sample was coated by gold sputtering for 400 seconds under 10 KV voltage prior to examination via scanning electron microscopy (SEM, Hitachi S-2500, Japan). The microsphere size ( $D_n$ ) and size distribution ( $D_w/D_n$ ) was determined by counting at least 200 microspheres from the SEM micrographs. To separate the

microspheres out from the polymerization medium, the final product was subjected to centrifugation for 5 minutes at 12,000 r/min (Avanti J301, Beckman). The supernatant was dried up at 100 °C for 24 h in order to evaluate the yield of the soluble polymer, and the sedimentated microspheres were also dried up to get their yield. The sum of the two yields was considered as the monomer conversion. To get the soluble polymer in EB and water-ethanol, the supernatant was further subjected to centrifugation for 15 minutes at the same speed, followed by shelf-standing for 3 h. The top EB phase and the bottom phase were separated. The soluble polymer in each phase was determined by gravimetry. To observe the interior structure of the assembled microspheres, the dry microspheres were put into a liquid nitrogen container and kept there for 3 min, and hit using a hammer. The fractured microspheres were examined under the same SEM.

**Part 3. SEM microspheres obtained using different organic solvent incorporated in H<sub>2</sub>O-EtOH binary solvent mixture.** Precipitation polymerization was carried out in a binary mixture of H<sub>2</sub>O (25.8 mL) and EtOH (60.2 mL) at H<sub>2</sub>O/EtOH of 3/7 by volume. 2 wt% of St and TMPTA were used as the monomers at TMPTA/St of 30/70 by mass, and 12 mL of the third solvent was added to the binary solvent of H<sub>2</sub>O/EtOH. The third solvents used included cyclohexane, ethyl acetate, acetone, butanone, trichloromethane, octanol, acetonitrile, ethyl benzene, xylene and toluene. Experimental results revealed that self-assembly of the primary particles was observed only when ethyl benzene, xylene or toluene was used as the third solvent. For a visual illustration, selected SEM pictures of the outcome microspheres are given in Fig. S1.

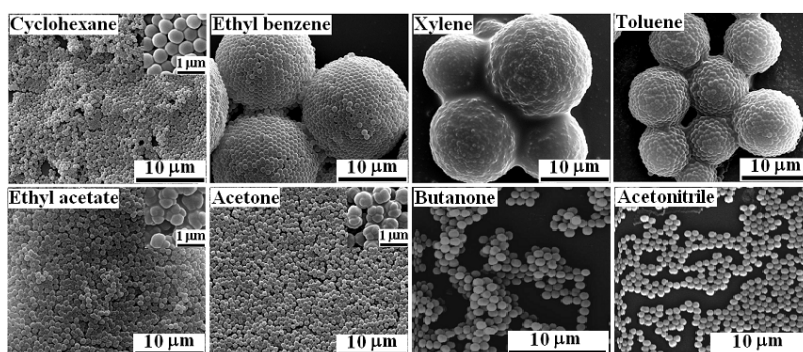

**Fig. S1** SEM pictures of resulting microspheres when doing precipitation polymerization of TMPTA-St in H<sub>2</sub>O-EtOH in the presence of a third solvent (shown on the pictures)

**Part 4. Solubility test of a third solvent in H<sub>2</sub>O-EtOH binary solvent.** In 100 mL of H<sub>2</sub>O-EtOH binary solvent in a centrifuge tube, 25 mL of a third solvent were added. The ternary solvent was sonicated at 40 KHz for 5 min (KQ-100, Kunshan Instruments, China), and left for shelf-standing for 1 h, 4 h and 24 h,

respectively, followed by centrifugation of the sample at 12,000 r/min for 15 min. The sample eventually phase separated into two phases at end of this process, H<sub>2</sub>O-EtOH at the bottom and an organic phase on the top. The top phase was carefully transferred into a pear-shaped separatory funnel and then left for shelf-standing for 24 h in order to separate out the thimbleful amount of H<sub>2</sub>O-EtOH entrained with the transfer of the upper phase. The whole amount of the organic phase thus obtained was considered as the amount of the third solvent exceeding its solubility in H<sub>2</sub>O-EtOH, and denoted as solvent separated from H<sub>2</sub>O/EtOH. The same test was done using different H<sub>2</sub>O/EtOH volume ratios of 2/8, 3/7 and 4/6. Results are given in Table S2. From these results, it was easily seen that the droplets were possibly present only for cyclohexane when mixed with the binary solvent at H<sub>2</sub>O/EtOH volume ratios of 2/8; and with increase in water content in H<sub>2</sub>O-EtOH, the solubility of certain tested solvents was significantly reduced, and thus the solubility of xylene, toluene and EB was all lowered to be less than 25 mL in 100 mL of the mixed H<sub>2</sub>O-EtOH solvent when its H<sub>2</sub>O/EtOH volume ratio increased to 3/7 or higher (with more water), i.e. excessive amount of xylene, toluene or EB was available for droplet formation. However, for the rest of the six solvents, they were thorough miscible with H<sub>2</sub>O-EtOH regardless of H<sub>2</sub>O/EtOH ratios tested as shown in Table S2.

**Table S2** Amount of a third solvent separated out with 25 mL of the solvent mixed with 100 mL of H<sub>2</sub>O-EtOH binary solvent

| Solvents                                                                 | Solvent separated (mL) in H <sub>2</sub> O/EtOH of different volume ratio |      |                           |      |                           |      |
|--------------------------------------------------------------------------|---------------------------------------------------------------------------|------|---------------------------|------|---------------------------|------|
|                                                                          | H <sub>2</sub> O/EtOH=2/8                                                 |      | H <sub>2</sub> O/EtOH=3/7 |      | H <sub>2</sub> O/EtOH=4/6 |      |
|                                                                          | 4 h <sup>a</sup>                                                          | 24 h | 4 h                       | 24 h | 4 h                       | 24 h |
| Cyclohexane                                                              | 16.0                                                                      | 15.0 | 21.0                      | 20.0 | 23.0                      | 23.0 |
| Ethyl benzene                                                            | 0                                                                         | 0    | 16.5                      | 16.5 | 22.5                      | 22.5 |
| Xylene                                                                   | 0                                                                         | 0    | 16.0                      | 16.0 | 21.5                      | 21.0 |
| Toluene                                                                  | 0                                                                         | 0    | 13.5                      | 13.0 | 21.0                      | 20.5 |
| Acetone, acetonitrile, ethyl acetate, butanone, octanol, trichlormethane | 0                                                                         | 0    | 0                         | 0    | 0                         | 0    |

<sup>a</sup> time of shelf-standing before the sample was centrifuged.

Since the experiments were mostly done with H<sub>2</sub>O/EtOH volume ratio at 3/7, the results in Table S2 obtained at H<sub>2</sub>O/EtOH volume ratio at 3/7 were further treated to give the amounts of a third solvent dissolved in and separated out with 25 mL of the solvent mixed with 100 mL of H<sub>2</sub>O-EtOH binary solvent at 3/7 volume ratio (Table S2). And the amount dissolved in 100 mL of H<sub>2</sub>O-EtOH was further transformed to

the equivalent in 86 mL of H<sub>2</sub>O-EtOH (Data in the right column in Table S3), the real amount used in the experiments of the present work.

**Table S3** Amounts of a third solvent dissolved in and separated out with 25 mL of the third solvent mixed with 100 mL of H<sub>2</sub>O-EtOH binary solvent at 3/7 volume ratio (obtained from Table S2)

| Solvents                                                                 | Solvent (mL)<br>separated from |      | Solvent (mL)<br>dissolved in |      | Solubility in 86<br>mL of H <sub>2</sub> O-EtOH |      |
|--------------------------------------------------------------------------|--------------------------------|------|------------------------------|------|-------------------------------------------------|------|
|                                                                          | 4 h <sup>a</sup>               | 24 h | 4 h                          | 24 h | 4 h                                             | 24 h |
| Cyclohexane                                                              | 21.0                           | 20.0 | 4.0                          | 5.0  | 3.4                                             | 4.3  |
| Ethyl benzene                                                            | 16.5                           | 16.5 | 8.5                          | 8.5  | 7.3                                             | 7.3  |
| Xylene                                                                   | 16.0                           | 16.0 | 9.0                          | 9.0  | 7.7                                             | 7.7  |
| Toluene                                                                  | 13.5                           | 13.0 | 11.5                         | 12.0 | 9.9                                             | 10.3 |
| Acetone, acetonitrile, ethyl acetate, butanone, octanol, trichlormethane | 0                              | 0    | >25                          |      | >21.5                                           |      |

<sup>a</sup> time of shelf-standing before the sample was centrifuged.

**Table S4** EB availability for droplet formation in precipitation polymerization of St-TMPTA in H<sub>2</sub>O-EtOH binary solvent with varied EB amount incorporated obtained from Table S3

| Run | H <sub>2</sub> O (mL) | EtOH (mL) | EB (mL) | EB solubility | EB (mL) available for droplet formation |
|-----|-----------------------|-----------|---------|---------------|-----------------------------------------|
| A1  | 27.6                  | 64.4      | 6.0     | 7.8           | 0.0                                     |
| A2  | 27.0                  | 63.0      | 8.0     | 7.7           | 0.3                                     |
| A3  | 26.4                  | 61.6      | 10.0    | 7.5           | 2.5                                     |
| A4  | 25.8                  | 60.2      | 12.0    | 7.3           | 4.7                                     |
| A5  | 25.2                  | 58.8      | 14.0    | 7.1           | 6.9                                     |
| A6  | 24.6                  | 57.4      | 16.0    | 7.0           | 9.0                                     |
| A7  | 24.0                  | 56.0      | 18.0    | 6.8           | 11.2                                    |
| A8  | 22.8                  | 53.2      | 22.0    | 6.5           | 15.5                                    |
| A9  | 21.0                  | 49.0      | 28.0    | 6.0           | 22.0                                    |

#### Part 5. Evolution of colloidosomes formation during the process of polymerization.

To study the evolution of the primary particles and formation of the assembled colloidosomes, precipitation polymerization was carried out in a binary mixture of H<sub>2</sub>O (25.8 mL) and EtOH (60.2 mL) at H<sub>2</sub>O/EtOH of 3/7 by volume. 2 wt% of St and TMPTA were used as the monomers at TMPTA/St of 30/70 by mass, and 12 mL of the third solvent was added to the binary solvent of H<sub>2</sub>O/EtOH. Samples were taken at different polymerization time and subjected to SEM observation (Figure S2).

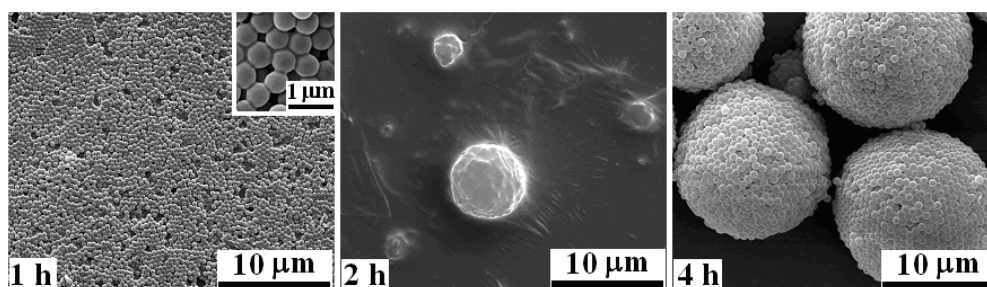

**Figure S2.** SEM pictures of the microspheres taken at different polymerization time (shown on the pictures)

### Part 6. Solubility parameters of the components in the polymerization system

**Table S5** Solubility parameters of monomers and solvents and observation of self-assembly of the in-situ formed primary particles

| Solvent                        | Solubility parameter (MPa <sup>1/2</sup> ) | Self-assembly observed | References                           |
|--------------------------------|--------------------------------------------|------------------------|--------------------------------------|
| Cyclohexane                    | 16.8                                       | No                     | <b>1</b><br>(given below this Table) |
| Xylene                         | 18.0                                       | Yes                    |                                      |
| Toluene                        | 18.2                                       | Yes                    |                                      |
| Ethyl benzene                  | 17.8                                       | Yes                    |                                      |
| Ethyl acetate                  | 18.2                                       | No                     | <b>1</b>                             |
| Butanone                       | 19.0                                       | No                     |                                      |
| Acetonitrile                   | 24.6                                       | No                     | <b>1</b>                             |
| Water                          | 47.9                                       |                        | <b>1</b>                             |
| Ethanol                        | 26.6                                       |                        | <b>1</b>                             |
| H <sub>2</sub> O/Ethanol (3/7) | 33.0                                       |                        | <b>2</b>                             |
| Styrene                        | 19.0                                       |                        | <b>1</b>                             |
| TMPTA                          | 22.1                                       |                        | <b>3</b>                             |
| TMPTA/St (3/7)                 | 19.8                                       |                        | <b>2</b>                             |

**1.** J. Brandrup, E. H. Immergut and E. A. Grulke. *Polymer Handbook* (Forth Edition), New York: John Wiley & Sons, Inc. 1999, pp. VII/698-701.

**2.** Calculated using the equation for the solubility parameter of the mixed solvents:

$$\delta_{\text{mix}} = \delta_1\phi_1 + \delta_2\phi_2 + \delta_3\phi_3 \dots$$

Where,  $\delta_{\text{mix}}$  is the solubility parameter of the solvent mixture,  $\delta_1$  that of the solvent 1,  $\phi_1$  the volume fraction of the solvent 1 in the mixture.

**3.** S. S. Shim, Y. H. Cho, J. H. Yoon and B. K. Kim, *Eur. Polym. J.*, 2009, **45**, 2184.
